# Supplementary material for: Preventive measures against the COVID-19 pandemic in Mexico: A cross-sectional study
Source: Frontiers journal article supplement (doi:10.3389/fpubh.2022.932010), 2022-10-11
Supplement: Data_Sheet_1.pdf [file Data_Sheet_1.pdf]

**Supplementary information: Additional file 1**

**Title:** Preventive measures against the COVID-19 pandemic in Mexico survey.

**Description:** Survey applied to identify the risk factors favoring the COVID-19 contagion by studying the Mexican population's quarantine behavior and preventive measures.

**Sex:** Male/Female

**Age:**

**State of residence:**

**Occupation:**

- a. Formal job
- b. Informal job
- c. Retired
- d. Student
- e. Neither working nor studying
- f. Other

**Education level:**

- a. Elementary school
- b. High school
- c. Middle school
- d. College
- e. Master's degree

**Do you have any health condition?**

None/Overweight/Obesity/Diabetes/Hypertension/Chronic kidney disease/Chronic obstructive pulmonary disease (COPD)/Posttransplantation/Cardiovascular disease/Human immunodeficiency virus infection/Other

**Do you consume any of the following substances?**

- a. Tobacco
- b. Alcohol
- c. Cannabis or other drugs
- d. Coffee
- e. None

**How many people live in your household?**

- a. 1–2
- b. 3–5
- c. 6 or more

**How many of the people living in your household frequently find themselves in need of breaking social isolation and leaving home?**

- a. None
- b. 1–2 people
- c. 3–5 people
- d. 6 or more people

**With how many people do you interact with daily?**

- a. None
- b. 1–5 people
- c. 6–10 people
- d. 11 or more

**Based on your daily activities, what is the risk that you think you have of contracting COVID-19?**

- a. Extremely high
- b. High
- c. Regular
- d. Low
- e. None

**How have you been practicing social distancing since the quarantine was established in Mexico?**

- a. I have continued my life in a normal way
- b. I have decreased my activities involving exposure to many people, but I keep going outside
- c. I go to work but remain outside home as less as possible
- d. I leave home exclusively for essential activities (e.g., getting groceries to continue social isolation)
- e. I do not leave home at all

**How often do you break social isolation and go out for an activity in which you interact with more people?**

- a. I have not broken social isolation
- b. Less than once a week, but more than once in a month
- c. Once per week
- d. Two or three times a week
- e. More than four times a week

**Why do you break social isolation? \*\*Select the more likely option according to you, maximum two answers.\*\***

- a. Disinterest
- b. Need to work
- c. Despair and need for recreational activities
- d. Family visits
- e. Errands
- f. I have not left home at all

**What do you think leads the Mexican population to break social isolation? \*\*Select the more likely option according to you, maximum two answers.\*\***

- a. Disinterest
- b. Need to work
- c. Despair and need for recreational activities
- d. Family visits
- e. Errands

**How many people in your closest circle do you consider not to be following adequate social distancing measures and behaving irresponsibly?**

- a. 1–2 people
- b. 3–5 people
- c. 6 or more

**Do you consider that you are following the proper rules for social distancing?**

- a. Yes
- b. No

**Do you use preventive measures against coronavirus daily (e.g., alcohol-based hand sanitizer, face masks, face shields, and safety eyewear)?**

- a. Always (all the time)
- b. Almost always (75% of the time)
- c. Sometimes (50% of the time)
- d. Almost never (25% of the time)
- e. Never (0% of the time)
- f. I never leave home

**Why do you not use preventive measures against coronavirus all the time? \*\*Select the more likely option according to you, maximum two answers.\*\***

- a. Disinterest
- b. It is tiring to use them
- c. It is difficult for me to buy them
- d. It is expensive to use them all the time
- e. I do not think that you need to use them all the time
- f. I think it is unlikely that I will be infected by coronavirus
- g. It does not apply: I use them all the time

**What percentage of the people that you see in the streets, at work or office, etc., use preventive measures against coronavirus (e.g., alcohol-based hand sanitizer, face masks, face shields, and safety eyewear)?**

- a. All of them (100% of the people)
- b. Majority (approximately 75% of the people)
- c. Half the people (approximately 50% of the people)
- d. Few people (approximately 25% of the people)
- e. Almost nobody (approximately <10% of the people)

**Why do you think that the Mexican population does not use coronavirus preventive measures all the time? \*\*Select the more likely option according to you, maximum two answers.\*\***

- a. Disinterest
- b. It is tiring to use them
- c. It is difficult for the population to buy them
- d. It is expensive for the population to use them all the time
- e. People do not think that they need to use the measures all the time
- f. People do not think that they are likely to be infected by coronavirus

**Depending on the category, select the type of protection method that you use the most:**

*Face masks*

- a. Certified face mask (e.g., Triple layer mask, N95, KN95)
- b. Noncertified face mask (e.g., fiber mask, carbon fiber face mask, handcrafted face mask, scarfs, painted mask)
- c. I do not use any face mask

*Mask/safety eyewear*

- a. Certified mask or safety eyewear (e.g., distributed by pharmaceutical companies, pharmacies, or health-care personnel)
- b. Noncertified mask or safety eyewear (e.g., acetate face shield, homemade face mask, or handcrafted face mask)
- c. I do not use any mask/safety eyewear

*Alcohol-based sanitizer*

- a. Certified alcohol-based sanitizer (e.g., distributed by pharmaceutical companies, pharmacies, or health-care personnel)
- b. Noncertified alcohol-based sanitizer (e.g., homemade sanitizer, custom made sanitizer)
- c. I do not use any alcohol-based sanitizer

**Do you stay informed about the pandemic in your country and state?**

- a. Yes, I stay informed
- b. Just a bit, I try to stay informed
- c. I prefer to avoid the news because it makes me feel anxious
- d. I am not interested

**Do you know what are the symptoms of COVID-19?**

Yes/No

**Do you know anybody who has presented symptoms of or was diagnosed with COVID-19?**

Yes/No

**Have you been tested for COVID-19?**

Yes/No

**If you have been tested, what was the result?**

Positive/Negative/I have not been tested.

**Do you know where to go in case of presenting COVID-19 symptoms?**

Yes/No

**Do you consider that health-care personnel of public hospitals are well trained to treat patients with COVID-19?**

Yes/No

**Which of the following do you consider as the most important factor for public hospitals to deal with the pandemic? \*\*Select the more likely option according to you, maximum two answers.\*\***

- a. Health-care personnel are not well prepared
- b. Health-care personnel do not have enough supplies
- c. There are not enough health-care personnel to serve the entire population
- d. The facilities and equipment required to deal with the pandemic situation are not available

**Do you consider that health-care personnel of private hospitals are well trained to treat patients with COVID-19?**

Yes/No
